# Supplementary material
Source: PubMed Central journal article supplement (PMC6510404)

S5

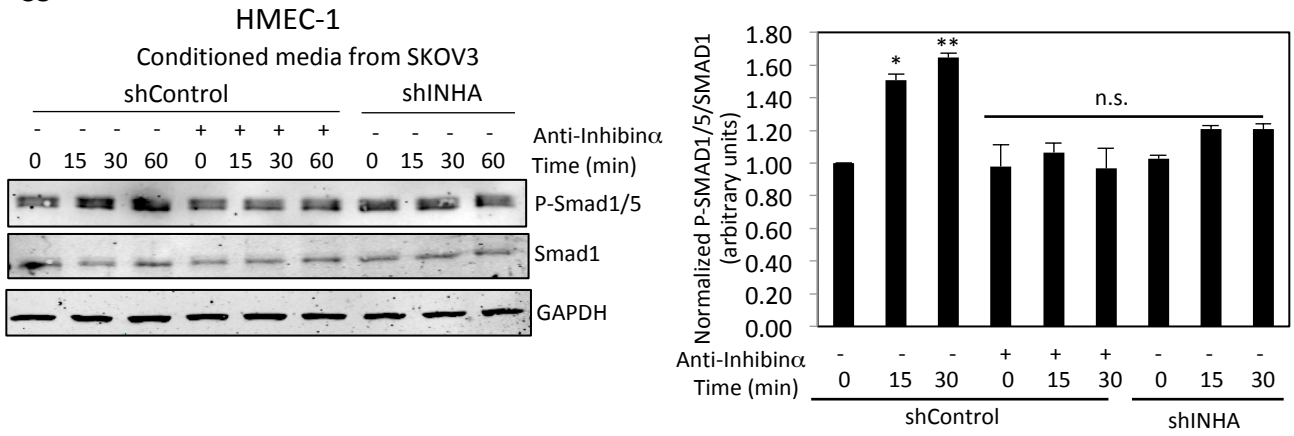

S6 (i)

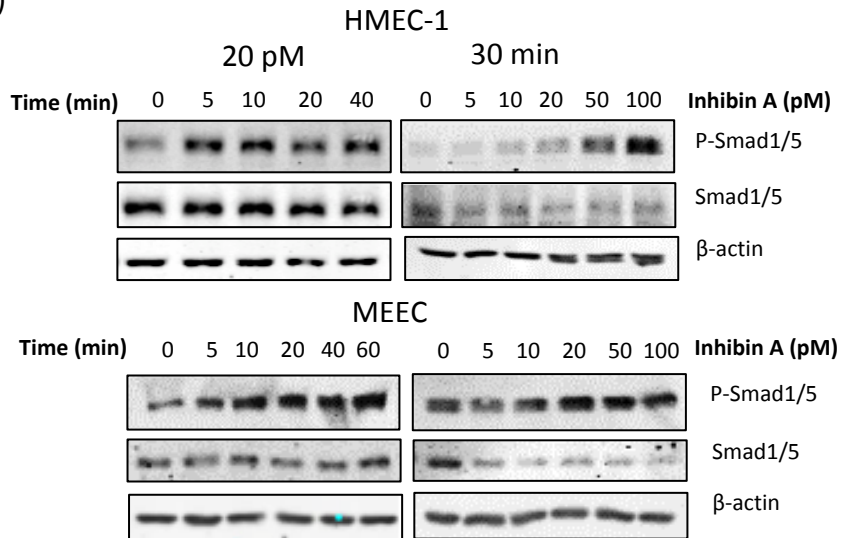

(ii)

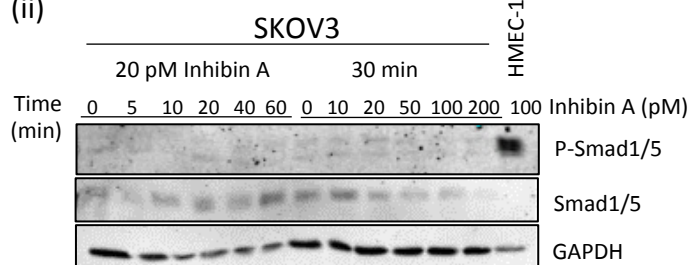

Supplement: NIHMS952185-supplement-6.pdf [file NIHMS952185-supplement-6.pdf]
